# Supplementary material for: Efficacy of journaling in the management of mental illness: a systematic review and meta-analysis
Source: PubMed Central journal article supplement — Fam Med Community Health. 2022 Mar 18;10(1):e001154. doi: 10.1136/fmch-2021-001154 (PMC8935176; doi:10.1136/fmch-2021-001154), 2022-03-18
Supplement: fmch-2021-001154supp001.pdf [file fmch-2021-001154supp001.pdf]

## APPENDIX I

### Detailed search strategy and selection methods

1. All databases, registers, websites, organisations, reference lists and other sources searched or consulted to identify studies. Specify the date when each source was last searched or consulted.

MEDLINE: date accessed – March 5<sup>th</sup> 2020

EMBASE: date accessed – March 5<sup>th</sup> 2020

PsycInfo: date accessed – March 5<sup>th</sup> 2020

2. Search strategy for MEDLINE (the same strategy was used for PsycInfo and EMBASE)

|    | Search terms                                                       | # of articles retrieved |
|----|--------------------------------------------------------------------|-------------------------|
| 1  | journaling.mp.                                                     | 368                     |
| 2  | gratitude.mp.                                                      | 1366                    |
| 3  | Reflective journal*.mp.                                            | 319                     |
| 4  | Journal writing.mp.                                                | 98                      |
| 5  | Reflective practice.mp.                                            | 1227                    |
| 6  | Expressive writing.mp.                                             | 311                     |
| 7  | Written emotional disclosure.mp.                                   | 61                      |
| 8  | exp Depression/                                                    | 115331                  |
| 9  | depress*.mp.                                                       | 532094                  |
| 10 | exp Self-Injurious Behavior/                                       | 69278                   |
| 11 | exp Substance-Related Disorders/                                   | 273882                  |
| 12 | addiction.mp.                                                      | 45821                   |
| 13 | exp Anxiety/ or exp Anxiety Disorders/                             | 152206                  |
| 14 | exp Mental Health/                                                 | 36661                   |
| 15 | exp Stress Disorders, Post-Traumatic/                              | 31689                   |
| 16 | exp Mental Disorders/                                              | 1216337                 |
| 17 | trauma.mp.                                                         | 259553                  |
| 18 | exp Chronic Pain/                                                  | 13647                   |
| 19 | mental health.mp.                                                  | 184811                  |
| 20 | 1 or 2 or 3 or 4 or 5 or 6 or 7                                    | 3545                    |
| 21 | 8 or 9 or 10 or 11 or 12 or 13 or 14 or 15 or 16 or 17 or 18 or 19 | 1989928                 |
| 22 | 20 and 21                                                          | 702                     |
| 23 | limit 22 to English language                                       | 686                     |
|    | <b>Total</b>                                                       | <b>686</b>              |
|    | <b>duplicates</b>                                                  | <b>0</b>                |

3. Methods used to decide whether a study met the inclusion criteria of the review, including how many reviewers screened each record and each report retrieved, whether they worked independently, and if applicable, details of automation tools used in the process.

Excel was utilized to extract articles from the databases and for the primary screening process. Inclusion criteria was determined following a brief literature search prior to article retrieval and was modified accordingly with team input as the screening proceeded. Two reviewers performed the primary screen in collaboration with a third reviewer available to resolve any conflict regarding inclusion. Two reviewers performed the secondary screen in collaboration with a third reviewer available to resolve any conflict regarding inclusion

4. Methods used to collect data from reports, including how many reviewers collected data from each report, whether they worked independently, any processes for obtaining or confirming data from study investigators, and if applicable, details of automation tools used in the process.

Two reviewers extracted data from included studies independently and in duplicate, and a third reviewer was available to resolve any conflict regarding inclusion

5. Methods used to assess risk of bias in the included studies, including details of the tool(s) used, how many reviewers assessed each study and whether they worked independently, and if applicable, details of automation tools used in the process.

The Cochrane risk of bias tool (ROB-2) and strength of recommendations taxonomy (SORT) were utilized to determine risk of bias and quality of the literature, respectively. A single reviewer completed both of these with reference to guidelines established by the ROB-2 and SORT creators.

## APPENDIX II

References for Articles Analyzed in the Systematic Review and Meta-Analysis

1. Alparone FR, Pagliaro S, Rizzo I. The words to tell their own pain: Linguistic markers of cognitive reappraisal in mediating benefits of expressive writing. *J Soc Clin Psychol*. 2015;34(6):495-507. doi:10.1521/jscp.2015.34.6.495
2. Barry LM, Singer GHS. After the NICU Experience Through Journal Writing. 2015:287-297.
3. Barton K, Jackson C. Impact of Writing About Caregiving Experiences. *Aust N Z J Psychiatry*. 2008;42:693-701.
4. Bernard M, Jackson C, Jones C. Written emotional disclosure following first-episode psychosis: Effects on symptoms of post-traumatic stress disorder. *Br J Clin Psychol*. 2006;45(3):403-415. doi:10.1348/014466505X68933
5. Dennick K, Bridle C, Sturt J. Written emotional disclosure for adults with Type 2 diabetes: a primary care feasibility study. *Prim Health Care Res Dev*. 2015;16(2):179-187. doi:10.1017/S1463423614000188
6. Di Blasio P, Camisasca E, Caravita SCS, Ionio C, Milani L, Valtolina GG. The effects of expressive writing on postpartum depression and posttraumatic stress symptoms. *Psychol Rep*. 2015;117(3):856-882. doi:10.2466/02.13.PR0.117c29z3
7. Ducasse D, Dassa D, Courtet P, et al. Gratitude diary for the management of suicidal inpatients: A randomized controlled trial. *Depress Anxiety*. 2019;36(5):400-411. doi:10.1002/da.22877
8. Horsch A, Tolsa JF, Gilbert L, du Chêne LJ, Müller-Nix C, Graz MB. Improving Maternal Mental Health Following Preterm Birth Using an Expressive Writing Intervention: A Randomized Controlled Trial. *Child Psychiatry Hum Dev*. 2016;47(5):780-791. doi:10.1007/s10578-015-0611-6
9. Jensen-Johansen MB, Christensen S, Valdimarsdottir H, et al. Effects of an expressive writing intervention on cancer-related distress in Danish breast cancer survivors - Results from a nationwide randomized clinical trial. *Psychooncology*. 2013;22(7):1492-1500. doi:10.1002/pon.3193
10. Koopman C, Ismailji T, Holmes D, Classen CC, Palesh O, Wales T. The effects of expressive writing on pain, depression and posttraumatic stress disorder symptoms in survivors of intimate partner violence. *J Health Psychol*. 2005;10(2):211-221. doi:10.1177/1359105305049769
11. Lovell B, Moss M, Wetherell MA. Assessing the feasibility and efficacy of written benefit-finding for caregivers of children with autism: A pilot study. *J Fam Stud*. 2016;22(1):32-42. doi:10.1080/13229400.2015.1020987
12. Martino ML, Freda MF, Camera F. Effects of Guided Written Disclosure Protocol on mood states and psychological symptoms among parents of off-therapy acute lymphoblastic leukemia children. *J Health Psychol*. 2013;18(6):727-736. doi:10.1177/1359105312462434
13. Meshberg-Cohen S, Svikis D, McMahon TJ. Expressive Writing as a Therapeutic Process for Drug-Dependent Women. *Subst Abus*. 2014;35(1):80-88. doi:10.1080/08897077.2013.805181

14. Possemato K, Ouimette P, Geller PA. Internet-based expressive writing for kidney transplant recipients: Effects on posttraumatic stress and quality of life. *Traumatology (Tallahass Fla)*. 2010;16(1):49-54. doi:10.1177/1534765609347545
15. Rabiepoor S, Vatankhah-Alamdary N, Khalkhali HR. The Effect of Expressive Writing on Postpartum Depression and Stress of Mothers with a Preterm Infant in NICU. *J Clin Psychol Med Settings*. 2019;(0123456789). doi:10.1007/s10880-019-09688-2
16. Rawlings GH, Brown I, Stone B, Reuber M. A pilot randomised controlled trial of a home-based writing intervention for individuals with seizures. *Psychol Heal*. 2018;33(9):1151-1171. doi:10.1080/08870446.2018.1478974
17. Schache KR, Hofman PL, Serlachius AS. A pilot randomized controlled trial of a gratitude intervention for adolescents with Type 1 diabetes. *Diabet Med*. 2020;37(8):1352-1356. doi:10.1111/dme.14078
18. Suhr M, Risch AK, Wilz G. Maintaining Mental Health Through Positive Writing: Effects of a Resource Diary on Depression and Emotion Regulation. *J Clin Psychol*. 2017;73(12):1586-1598. doi:10.1002/jclp.22463
19. Wong CCY, Mak WWS. Writing Can Heal: Effects of Self-Compassion Writing among Hong Kong Chinese College Students. *Asian Am J Psychol*. 2016. doi:10.1037/aap0000041

**APPENDIX III****Demographic variables, results and questionnaires used to measure outcomes across studies**

| Study                   | Population                                         | Sample Size | Results<br>(+/-)*                                              | Measures <sup>±</sup> |
|-------------------------|----------------------------------------------------|-------------|----------------------------------------------------------------|-----------------------|
| Alparone et al (2015)   | undergraduate students                             | 62          | (+) significant decrease in anxiety                            | POMS                  |
| Barry & Singer (2001)   | mothers with an infant in NICU                     | 38          | (+) significant decrease in PTSD-related symptoms              | IES-R                 |
| Barton & Jackson (2008) | caregivers of individuals suffering from psychosis | 36          | (-) no significant outcomes                                    | GHQ-28, IES-R         |
| Bernard et al (2006)    | individuals recovering from psychosis              | 22          | (+) significant decrease in PTSD-related symptoms              | IES-R                 |
| Dennick et al (2015)    | adults with type 2 diabetes                        | 41          | (-) significant increase in depressive symptoms                | CES-D                 |
| Di Blasio et al (2015)  | women with PPD                                     | 113         | (+) significant decrease in symptoms of PPD & PTSD             | BDI-II, PPQ           |
| Ducasse et al (2018)    | suicidal inpatients                                | 198         | (+) significant decrease in symptoms of depression and anxiety | STAI, BDI             |
| Graf et al. (2008)      | individuals receiving outpatient psychotherapy     | 44          | (+) significant decrease in symptoms of anxiety                | DASS                  |

|                              |                                             |     |                                                                                                            |            |
|------------------------------|---------------------------------------------|-----|------------------------------------------------------------------------------------------------------------|------------|
| Horsch et al (2016)          | mothers who have had a pre-term birth       | 54  | (+) significant decrease in symptoms of depression and PTSD                                                | EPDS, PPQ  |
| Jensen-Johansen et al (2012) | breast cancer survivors                     | 318 | (+) significant decrease in symptoms of depression and PTSD                                                | BDI, IES-R |
| Koopman et al (2005)         | survivors of intimate partner violence      | 47  | (+) significant decrease in depressive symptoms<br>(-) no significant reductions of PTSD-related symptoms  | BDI, PCL-5 |
| Lovell et al (2016)          | caregivers of children with autism          | 74  | (+) significant decrease in symptoms of depression<br>(-) no significant reductions in symptoms of anxiety | HADS       |
| Martino et al (2012)         | parents of children suffering from leukemia | 46  | (+) significant decrease in symptoms of depression and anxiety                                             | POMS       |
| Meshberg-Cohen et al (2014)  | women receiving treatment for addiction     | 149 | (+) significant reductions in symptoms of PTSD                                                             | PDS        |
| Possemato et al (2010)       | kidney transplant recipients                | 48  | (-) no significant reductions in symptoms of PTSD                                                          | PCL-M      |
| Rabiepoor et al (2019)       | mothers with infants in the NICU            | 91  | (+) significant decrease in symptoms of PPD                                                                | EPDS       |

|                           |                                          |    |                                                                                             |               |
|---------------------------|------------------------------------------|----|---------------------------------------------------------------------------------------------|---------------|
| Rawlings et al (2018)     | individuals suffering from seizures      | 68 | (-) no significant reductions in anxiety<br>(+) significant decrease in depressive symptoms | GAD-7, NDDI-E |
| Schache et al (2019)      | adolescents with type 1 diabetes         | 60 | (-) no significant reductions in symptoms of depression                                     | CES-D         |
| Suhr, Risch & Wilz (2017) | recently discharged psychiatric patients | 89 | (+) significant decrease in symptoms of depression                                          | BDI-II        |
| Wong & Mak (2016)         | university students                      | 65 | (-) no significant reductions symptoms of depression                                        | CES-D         |

\*+ indicates an effective intervention with significant differences between control and intervention groups.

- indicates an intervention that was not effective with no significant differences between control and intervention groups.

± refer to Appendix V for detailed names of measures used.

**APPENDIX IV****Journaling type, mental illness symptom studied, effect size, and significance of outcomes across individual studies**

| Study                   | Intervention       | Mental Illness Symptom | Cohen's d Effect Size | Outcome (+/-)* |
|-------------------------|--------------------|------------------------|-----------------------|----------------|
| Alparone et al (2015)   | Expressive Writing | Anxiety                | 0.646                 | +              |
| Graf et al. (2008)      | Expressive Writing | Anxiety                | 0.293                 | +              |
| Lovell et al (2016)     | Expressive Writing | Anxiety                | 0.432                 | -              |
| Martino et al (2012)    | Expressive Writing | Anxiety                | 0.396                 | +              |
| Rawlings et al (2018)   | Expressive Writing | Anxiety                | 0.143                 | -              |
| Barton & Jackson (2008) | Expressive Writing | Anxiety                | 0.026                 | -              |
| Barry & Singer (2001)   | Expressive Writing | Depression             | 0.805                 | +              |
| Barton & Jackson (2008) | Expressive Writing | Depression             | 0.28                  | -              |
| Dennick et al (2015)    | Expressive Writing | Depression             | 4.193                 | -              |
| Di Blasio et al (2015)  | Expressive Writing | Depression             | 0.418                 | +              |
| Horsch et al (2016)     | Expressive Writing | Depression             | 0.221                 | +              |

|                              |                    |            |       |   |
|------------------------------|--------------------|------------|-------|---|
| Jensen-Johansen et al (2012) | Expressive Writing | Depression | 0.117 | + |
| Koopman et al (2005)         | Expressive Writing | Depression | 0.376 | + |
| Lovell et al (2016)          | Expressive Writing | Depression | 0.296 | + |
| Martino et al (2012)         | Expressive Writing | Depression |       | + |
| Rabiepoor et al (2019)       | Expressive Writing | Depression | 0.705 | + |
| Rawlings et al (2018)        | Expressive Writing | Depression | 0.275 | + |
| Wong & Mak (2016)            | Expressive Writing | Depression | 0.391 | - |
| Barry & Singer (2001)        | Expressive Writing | PTSD       | 0.766 | + |
| Barton & Jackson (2008)      | Expressive Writing | PTSD       | 0.039 | - |
| Bernard et al (2006)         | Expressive Writing | PTSD       | 0.296 | + |
| Di Blasio et al (2015)       | Expressive Writing | PTSD       | 0.937 | + |
| Horsch et al (2016)          | Expressive Writing | PTSD       | 0.371 | + |
| Jensen-Johansen et al (2012) | Expressive Writing | PTSD       | 0.147 | + |

|                             |                      |            |       |   |
|-----------------------------|----------------------|------------|-------|---|
| Koopman et al (2005)        | Expressive Writing   | PTSD       | 0.104 | - |
| Meshberg-Cohen et al (2014) | Expressive Writing   | PTSD       | 0.000 | + |
| Possemato et al (2010)      | Expressive Writing   | PTSD       | 0.411 | - |
| Ducasse et al (2018)        | Gratitude Journaling | Anxiety    | 0.279 | + |
| Ducasse et al (2018)        | Gratitude Journaling | Depression | 0.104 | + |
| Schache et al (2019)        | Gratitude Journaling | Depression | 0.16  | - |
| Suhr, Risch & Wilz (2017)   | Gratitude Journaling | Depression | 0.33  | + |

\*+ indicates an effective intervention with significant differences between control and intervention groups.

- indicates an intervention that was not effective with no significant differences between control and intervention groups.

## APPENDIX V

### Abbreviated and full names of patient health measures used in studies to measure outcomes

| Measures                                                          |
|-------------------------------------------------------------------|
| BDI = Beck Depression Inventory                                   |
| BDI-II = Beck Depression Inventory second edition                 |
| CES-D = Centre for Epidemiological Studies Depression Scale       |
| DASS = Depression Anxiety Stress Scale                            |
| EPDS = Edinburgh Post-natal Depression Scale                      |
| GAD-7 = General Anxiety Disorder 7-items                          |
| GHQ-28 = General Health Questionnaire 28-items                    |
| GHQ-9 = General Health Questionnaire 9-items                      |
| HADS = Hamilton Anxiety and Depression Scale                      |
| IES-R = Impact of Event Scale Revised                             |
| MASC = Multidimensional Anxiety Scale for Children                |
| NDDI-E = Neurological Disorders Depression Inventory for Epilepsy |
| PCL-M = PTSD Checklist Military Version                           |
| PCL-5 = PTSD Checklist for the DSM-5                              |
| PDS = Post-traumatic Diagnostic Scale                             |
| PPQ = Perinatal PTSD Questionnaire                                |
| PHQ-9 = Patient Health Questionnaire 9-items                      |
| POMS = Profile of Mood States                                     |

## APPENDIX VI

## Results of Meta-regression for Anxiety

| SYMPTOM              | ANXIETY                |         |   |                        |         |   |
|----------------------|------------------------|---------|---|------------------------|---------|---|
|                      | Intervention Arm       |         |   | Control Arm            |         |   |
| Variable             | Regression Coefficient | p-value |   | Regression Coefficient | p-value |   |
| Sample Size          | 0.029                  | 0.772   |   | -0.088                 | 0.270   |   |
| Type of Journaling   | -0.025                 | 0.805   |   | 0.004                  | 0.968   |   |
| Study Duration       | —                      |         |   | —                      | 0.503   |   |
| Journal Analysis     | -0.155                 | 0.057   |   | -0.083                 | 0.301   |   |
| Sex                  | 0.178                  | 0.038*  |   | 0.181                  | 0.002*  |   |
| Age                  | 0.017                  | 0.871   |   | -0.061                 |         |   |
| Region-Europe        | 0.026                  | 0.850   | — | 0.021                  | 0.867   | — |
| Region-North America | —                      |         |   | —                      |         |   |
| Region-Australia     | —                      |         |   | —                      |         |   |

## Results of Meta-regression for Depression

| SYMPTOM            | DEPRESSION             |         |                        |         |  |
|--------------------|------------------------|---------|------------------------|---------|--|
|                    | Intervention Arm       |         | Control Arm            |         |  |
| Variable           | Regression Coefficient | p-value | Regression Coefficient | p-value |  |
| Sample Size        | 0.024                  | 0.616   | -0.012                 | 0.711   |  |
| Type of Journaling | -0.050                 | 0.226   | -0.051                 | 0.065   |  |
| Study Duration     | -0.104                 | 0.005*  | -0.056                 | 0.035   |  |
| Journal Analysis   | -0.078                 | 0.043   | -0.012                 | 0.678   |  |
| Sex                | 0.041                  | 0.299   | 0.025                  | 0.357   |  |
| Age                | -0.003                 | 0.939   | -0.019                 | 0.492   |  |

|                      |        |       |       |        |       |       |
|----------------------|--------|-------|-------|--------|-------|-------|
| Region-Europe        | -0.082 | 0.313 | 0.673 | -0.024 | 0.684 | 0.722 |
| Region-North America | -0.140 | 0.284 |       | -0.108 | 0.295 |       |
| Region-Australia     | -0.060 | 0.599 |       | -0.042 | 0.610 |       |

## Results of Meta-regression for PTSD

| SYMPTOM              | PTSD                   |         |   |                        |         |   |
|----------------------|------------------------|---------|---|------------------------|---------|---|
|                      | Intervention Arm       |         |   | Control Arm            |         |   |
| Variable             | Regression Coefficient | p-value |   | Regression Coefficient | p-value |   |
| Sample Size          | -0.005                 | 0.897   |   | -0.001                 | 0.980   |   |
| Type of Journaling   | —                      |         |   | —                      |         |   |
| Study Duration       | —                      |         |   | —                      |         |   |
| Journal Analysis     | -0.017                 | 0.647   |   | 0.006                  | 0.803   |   |
| Sex                  | 0.032                  | 0.398   |   | -0.012                 | 0.642   |   |
| Age                  | 0.073                  | 0.012*  |   | —                      |         |   |
| Region-Europe        | 0.018                  | 0.630   | — | -0.013                 | 0.555   | — |
| Region-North America | —                      |         |   | —                      |         |   |
| Region-Australia     | —                      |         |   | —                      |         |   |

## APPENDIX VII

Results from the Cochrane risk of bias assessment tool for randomized control trials

|                                     | <b>Risk-of-bias judgement</b> | <b>Risk of bias judgement</b> |
|-------------------------------------|-------------------------------|-------------------------------|-------------------------------|-------------------------------|-------------------------------|-------------------------------|
| <b>Study</b>                        | <b>Domain 1</b>               | <b>Domain 2</b>               | <b>Domain 3</b>               | <b>Domain 4</b>               | <b>Domain 5</b>               | <b>overall</b>                |
| <b>Alparone et al (2015)</b>        | Some Concerns                 | High                          | Some Concerns                 | Low                           | Some Concerns                 | Some Concerns                 |
| <b>Bernard et al (2006)</b>         | Low                           | Low                           | Low                           | Low                           | Some Concerns                 | Some Concerns                 |
| <b>Dennick et al (2015)</b>         | Low                           | Low                           | Low                           | Low                           | Low                           | Low risk of bias              |
| <b>Di Blasio et al (2015)</b>       | Low                           | Low                           | Low                           | Low                           | High                          | Low risk of bias              |
| <b>Ducasse et al (2018)</b>         | Low                           | Low                           | Low                           | Low                           | Low                           | Low risk of bias              |
| <b>Graf et al. (2008)</b>           | Some Concerns                 | High                          | Low                           | Low                           | Low                           | High risk of bias             |
| <b>Horsch et al (2016)</b>          | Low                           | Low                           | Low                           | Low                           | Low                           | low risk of bias              |
| <b>Jensen-Johansen et al (2012)</b> | Low                           | Low                           | Low                           | Low                           | Low                           | Low risk of bias              |
| <b>Barton &amp; Jackson (2008)</b>  | Low                           | Some Concerns                 | Low                           | Low                           | Low                           | Low risk of bias              |
| <b>Koopman et al (2005)</b>         | Some Concerns                 | Low                           | High                          | Low                           | Low                           | High risk of bias             |

|                                       |               |      |               |               |               |                   |
|---------------------------------------|---------------|------|---------------|---------------|---------------|-------------------|
| <b>Barry &amp; Singer (2001)</b>      | Low           | Low  | Low           | Low           | Low           | Low risk of bias  |
| <b>Lovell et al (2016)</b>            | Low           | Low  | Low           | Some Concerns | Low           | Low risk of bias  |
| <b>Suhr, Risch, &amp; Wilz (2017)</b> | Low           | Low  | Low           | Low           | Low           | Low risk of bias  |
| <b>Martino et al (2012)</b>           | High          | High | Low           | Some Concerns | Low           | High risk of bias |
| <b>Meshberg-Cohen et al (2014)</b>    | Some Concerns | Low  | Low           | Low           | Low           | Some Concerns     |
| <b>Possemato et al (2010)</b>         | Low           | Low  | Low           | Low           | Low           | Low risk of bias  |
| <b>Rabiepoor et al (2019)</b>         | Low           | Low  | Low           | Low           | Low           | Low risk of bias  |
| <b>Rawlings et al (2018)</b>          | Low           | Low  | Some Concerns | Low           | Low           | Some Concerns     |
| <b>Schache et al (2019)</b>           | Low           | High | Some Concerns | Low           | Some Concerns | High risk of bias |
| <b>Wong &amp; Mak (2016)</b>          | Low           | Low  | Low           | Low           | Low           | Low risk of bias  |
